# Supplementary material
Source: Elsevier journal article supplement (https://rcastoragev2.blob.core.windows.net/c304b21a551465b2f1bd70989d9253ae/mmc1.pdf)
Supplement: mmc1 [file mmc1.pdf]

# THE LANCET

## Public Health

### **Supplementary appendix**

This appendix formed part of the original submission and has been peer reviewed.  
We post it as supplied by the authors.

Supplement to: Floud S, Balkwill A, Sweetland S, et al. Cognitive and social activities and long-term dementia risk: the prospective UK Million Women Study. *Lancet Public Health* 2021; **6**: e116–23.

This blank page is inserted to rectify the appendix page numbering during the Lancet Public Health editorial process

# CONTENTS

| Supplementary Figures and Tables                                                                                                                                                                                                                  | Page       |
|---------------------------------------------------------------------------------------------------------------------------------------------------------------------------------------------------------------------------------------------------|------------|
| <b>eTable 1.</b> Agreement of reported participation in cognitive and social activities in two questionnaires completed 4 years apart (n=569,357)                                                                                                 | <b>3</b>   |
| <b>eFigure 1.</b> Flow chart of women included in the analyses of cognitive and social activities (out of 1.3 million recruited in median year 1998)                                                                                              | <b>4</b>   |
| <b>eTable 2.</b> Characteristics at recruitment (in 1998) for women included in the analyses, by participation in certain cognitive and social activities, showing each category of covariate                                                     | <b>5-6</b> |
| <b>eTable 3.</b> Characteristics at recruitment (in 1998) for women included in the analyses who were still alive after 10 years of follow-up and with no previous dementia detected, by participation in certain cognitive and social activities | <b>7</b>   |
| <b>eTable 4.</b> Dementia detection risk ratios during the second decade of follow-up after various activities were recorded, comparing non-participation vs participation in them: effect of adjustment by various factors                       | <b>8</b>   |
| <b>eTable 5.</b> Dementia detection risk ratios during the second decade of follow-up after various activities were recorded, comparing non-participation vs participation in them: effect of decade of age at recording                          | <b>9</b>   |
| <b>eFigure 2.</b> Million Women Study results for PHYSICAL inactivity: Dementia detection rate ratios, inactive vs active, during various time periods after recording PHYSICAL activity ( <i>Neurology</i> 2020; 94: e123–32)                    | <b>10</b>  |
| <b>Acknowledgements</b><br>Membership of the Million Women Study Advisory Committee; Million Women Study coordinating centre staff; NHS Breast Cancer Screening Programme collaborating centres                                                   | <b>11</b>  |

**eTable 1. Agreement of reported participation in cognitive and social activities in two questionnaires completed 4 years apart (n=569,357)**

| <b>Cognitive/social activity</b> | <b>Agreement</b> |
|----------------------------------|------------------|
| Adult education                  | 86%              |
| Art/craft/music                  | 89%              |
| Voluntary work                   | 85%              |

**eFigure 1. Flow chart of women included in the analyses of cognitive and social activities (out of 1.3 million recruited in median year 1998)**

**A. For analyses of 3 cognitive/social activities & risk of dementia**

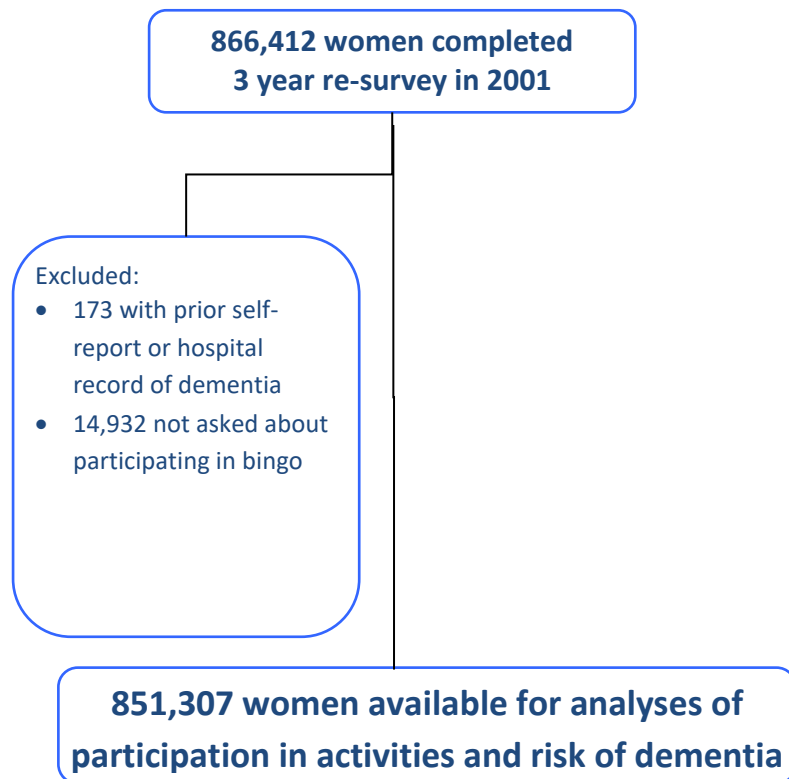

**B. For analyses of reading & risk of dementia**

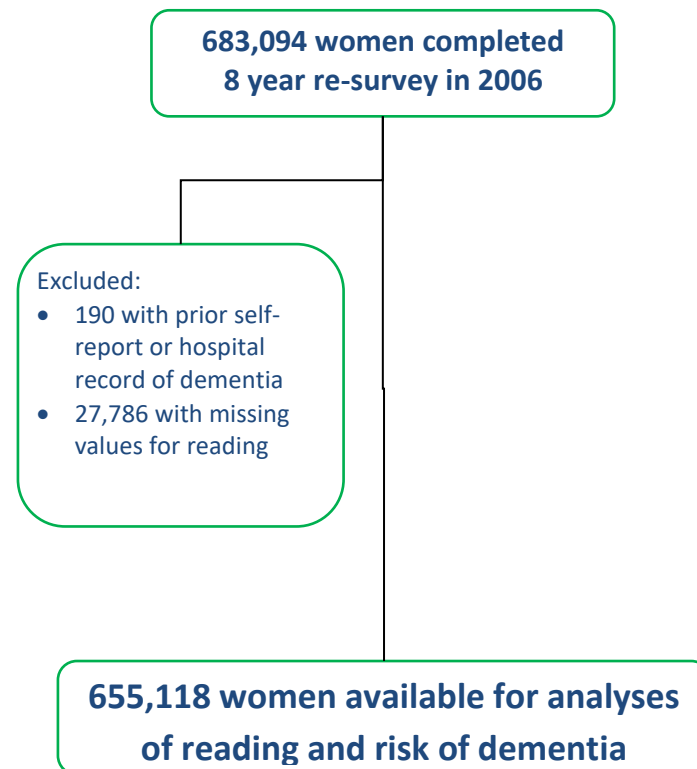

**eTable 2. Characteristics at recruitment (in 1998) for women included in the analyses, by participation in certain cognitive and social activities, showing each category of covariate**

|                                                       | Adult education<br>(baseline for these analyses<br>was median year 2001) |               | Art/craft/music groups<br>(baseline for these analyses<br>was median year 2001) |               | Voluntary work<br>(baseline for these analyses<br>was median year 2001) |               | Reading<br>(baseline for these analyses<br>was median year 2006) |             |
|-------------------------------------------------------|--------------------------------------------------------------------------|---------------|---------------------------------------------------------------------------------|---------------|-------------------------------------------------------------------------|---------------|------------------------------------------------------------------|-------------|
|                                                       | Not<br>participating                                                     | Participating | Not<br>participating                                                            | Participating | Not<br>participating                                                    | Participating | No reading                                                       | Any reading |
| Women, n                                              | 748,874                                                                  | 102,433       | 740,435                                                                         | 110,872       | 689,730                                                                 | 161,577       | 23,476                                                           | 631,642     |
| Mean age at recording activities, years (SD)          | 60.0 (5.0)                                                               | 60.2 (5.0)    | 59.9 (4.9)                                                                      | 60.9 (5.0)    | 59.8 (4.9)                                                              | 61.0 (5.0)    | 63.6 (4.8)                                                       | 64.4 (4.8)  |
| <b>Variables recorded in median year 1998</b>         |                                                                          |               |                                                                                 |               |                                                                         |               |                                                                  |             |
| Education, %                                          |                                                                          |               |                                                                                 |               |                                                                         |               |                                                                  |             |
| Tertiary qualifications                               | 13                                                                       | 34            | 14                                                                              | 29            | 13                                                                      | 27            | 6                                                                | 18          |
| Secondary qualifications                              | 28                                                                       | 37            | 28                                                                              | 34            | 28                                                                      | 36            | 17                                                               | 31          |
| Technical qualifications                              | 17                                                                       | 16            | 17                                                                              | 17            | 17                                                                      | 17            | 15                                                               | 17          |
| Completed compulsory schooling with no qualifications | 39                                                                       | 13            | 39                                                                              | 19            | 40                                                                      | 19            | 59                                                               | 32          |
| Did not complete compulsory schooling                 | 2                                                                        | 1             | 2                                                                               | 1             | 2                                                                       | 1             | 4                                                                | 1           |
| Deprivation, %                                        |                                                                          |               |                                                                                 |               |                                                                         |               |                                                                  |             |
| Q1 (least deprived)                                   | 21                                                                       | 26            | 21                                                                              | 26            | 21                                                                      | 25            | 16                                                               | 23          |
| Q2                                                    | 21                                                                       | 24            | 21                                                                              | 24            | 21                                                                      | 24            | 18                                                               | 22          |
| Q3                                                    | 20                                                                       | 21            | 20                                                                              | 22            | 20                                                                      | 22            | 19                                                               | 21          |
| Q4                                                    | 20                                                                       | 18            | 20                                                                              | 18            | 20                                                                      | 18            | 21                                                               | 19          |
| Q5 (most deprived)                                    | 18                                                                       | 12            | 18                                                                              | 10            | 18                                                                      | 11            | 26                                                               | 15          |
| Strenuous exercise, %                                 |                                                                          |               |                                                                                 |               |                                                                         |               |                                                                  |             |
| Rarely/never                                          | 47                                                                       | 30            | 46                                                                              | 34            | 47                                                                      | 34            | 60                                                               | 42          |
| <once a week                                          | 13                                                                       | 16            | 13                                                                              | 16            | 13                                                                      | 16            | 9                                                                | 14          |
| 1-3 times a week                                      | 34                                                                       | 46            | 34                                                                              | 43            | 34                                                                      | 43            | 24                                                               | 37          |
| >3 times a week                                       | 6                                                                        | 7             | 6                                                                               | 7             | 6                                                                       | 7             | 7                                                                | 6           |
| Smoking, %                                            |                                                                          |               |                                                                                 |               |                                                                         |               |                                                                  |             |
| Never                                                 | 51                                                                       | 57            | 50                                                                              | 61            | 50                                                                      | 60            | 44                                                               | 54          |
| Past                                                  | 28                                                                       | 30            | 28                                                                              | 27            | 28                                                                      | 27            | 27                                                               | 28          |
| Current <10 cigarettes per day                        | 4                                                                        | 3             | 4                                                                               | 3             | 4                                                                       | 3             | 5                                                                | 4           |

|                                               |    |    |    |    |    |    |    |    |
|-----------------------------------------------|----|----|----|----|----|----|----|----|
| Current 10-19 cigarettes per day              | 8  | 4  | 8  | 3  | 8  | 4  | 11 | 7  |
| Current 20+ cigarettes per day                | 4  | 2  | 4  | 2  | 4  | 2  | 7  | 3  |
| Body mass index kg/m <sup>2</sup> , %         |    |    |    |    |    |    |    |    |
| <20                                           | 4  | 4  | 4  | 4  | 4  | 4  | 4  | 4  |
| 20-24.9                                       | 44 | 49 | 44 | 46 | 44 | 47 | 39 | 45 |
| 25-29.9                                       | 36 | 33 | 35 | 35 | 35 | 35 | 35 | 35 |
| 30+                                           | 17 | 14 | 17 | 16 | 17 | 15 | 22 | 16 |
| Alcohol units/week, %                         |    |    |    |    |    |    |    |    |
| 0                                             | 22 | 14 | 22 | 17 | 22 | 18 | 34 | 19 |
| 1-2                                           | 31 | 31 | 31 | 33 | 31 | 32 | 29 | 32 |
| 3-6                                           | 22 | 26 | 22 | 25 | 22 | 25 | 17 | 24 |
| 7-14                                          | 19 | 23 | 19 | 20 | 19 | 20 | 15 | 20 |
| 15+                                           | 5  | 6  | 5  | 5  | 5  | 5  | 5  | 5  |
| Use of menopausal hormones, %                 |    |    |    |    |    |    |    |    |
| Never                                         | 49 | 47 | 49 | 49 | 49 | 50 | 50 | 48 |
| Past                                          | 17 | 18 | 17 | 18 | 17 | 17 | 17 | 17 |
| Current                                       | 34 | 36 | 34 | 33 | 34 | 32 | 33 | 35 |
| <b>Variables recorded in median year 2001</b> |    |    |    |    |    |    |    |    |
| Self-rated health, % ‡                        |    |    |    |    |    |    |    |    |
| Poor                                          | 3  | 2  | 3  | 2  | 3  | 2  | 7  | 2  |
| Fair                                          | 22 | 16 | 22 | 17 | 22 | 17 | 30 | 19 |
| Good                                          | 59 | 60 | 59 | 60 | 58 | 61 | 51 | 61 |
| Excellent                                     | 16 | 22 | 17 | 21 | 16 | 21 | 12 | 18 |
| Not married/partner, % ‡                      | 19 | 24 | 19 | 21 | 19 | 23 | 24 | 21 |
| Paid work, % ‡                                |    |    |    |    |    |    |    |    |
| Full-time                                     | 19 | 17 | 20 | 13 | 21 | 11 | 17 | 18 |
| Part-time                                     | 24 | 25 | 25 | 23 | 25 | 22 | 23 | 25 |
| None                                          | 55 | 57 | 54 | 64 | 53 | 66 | 59 | 57 |
| High blood pressure, %                        | 23 | 19 | 23 | 21 | 23 | 21 | 18 | 18 |
| Diabetes, %                                   | 4  | 2  | 3  | 3  | 4  | 3  | 4  | 2  |
| Depression, %                                 | 7  | 7  | 7  | 7  | 7  | 6  | 7  | 5  |

‡ For analyses of reading, information on self-rated health, marital status or paid work was not reported in 2001 by 18% of the women, and so the missing information was supplemented by information reported in median year 2006

**eTable 3. Characteristics at recruitment (in 1998) for women included in the analyses who were still alive after 10 years of follow-up and with no previous dementia detected, by participation in certain cognitive and social activities**

|                                                 | Adult education<br>(baseline for these analyses was<br>median year 2001) |               | Art/craft/music groups<br>(baseline for these analyses was<br>median year 2001) |               | Voluntary work<br>(baseline for these analyses was<br>median year 2001) |               | Reading<br>(baseline for these analyses was<br>median year 2006) |             |
|-------------------------------------------------|--------------------------------------------------------------------------|---------------|---------------------------------------------------------------------------------|---------------|-------------------------------------------------------------------------|---------------|------------------------------------------------------------------|-------------|
|                                                 | Not participating                                                        | Participating | Not participating                                                               | Participating | Not participating                                                       | Participating | No reading                                                       | Any reading |
| Women, n                                        | 692,903                                                                  | 96,436        | 685,490                                                                         | 103,849       | 638,275                                                                 | 151,064       | 19,997                                                           | 569,840     |
| Mean age at recording activities, years (SD)    | 59.9 (5)                                                                 | 60.0 (5)      | 59.7 (5)                                                                        | 60.8 (5)      | 59.7 (5)                                                                | 60.8 (5)      | 63.1 (5)                                                         | 64.1 (5)    |
| <b>Variables recorded in median year 1998</b>   |                                                                          |               |                                                                                 |               |                                                                         |               |                                                                  |             |
| No educational qualifications, %                | 41                                                                       | 13            | 40                                                                              | 20            | 42                                                                      | 20            | 62                                                               | 32          |
| Most deprived fifth, %                          | 17                                                                       | 11            | 17                                                                              | 10            | 18                                                                      | 11            | 25                                                               | 15          |
| Rarely/never strenuous exercise, %              | 46                                                                       | 30            | 46                                                                              | 33            | 47                                                                      | 34            | 58                                                               | 41          |
| Current smoker, %                               | 16                                                                       | 9             | 16                                                                              | 7             | 16                                                                      | 9             | 21                                                               | 13          |
| Body mass index $\geq 30$ kg/m <sup>2</sup> , % | 17                                                                       | 14            | 16                                                                              | 15            | 17                                                                      | 15            | 21                                                               | 15          |
| Alcohol 15+ units/week, %                       | 5                                                                        | 6             | 5                                                                               | 5             | 5                                                                       | 5             | 5                                                                | 5           |
| Ever user of menopausal hormones, %             | 51                                                                       | 54            | 51                                                                              | 52            | 52                                                                      | 50            | 51                                                               | 52          |
| <b>Variables recorded in median year 2001</b>   |                                                                          |               |                                                                                 |               |                                                                         |               |                                                                  |             |
| Poor/fair self-rated health, %‡                 | 23                                                                       | 16            | 23                                                                              | 19            | 24                                                                      | 17            | 33                                                               | 19          |
| Not married/partner, %‡                         | 19                                                                       | 23            | 19                                                                              | 21            | 18                                                                      | 22            | 23                                                               | 20          |
| Not in paid work, %‡                            | 54                                                                       | 57            | 53                                                                              | 63            | 52                                                                      | 65            | 55                                                               | 55          |
| Treated for high blood pressure, %              | 22                                                                       | 19            | 22                                                                              | 21            | 22                                                                      | 21            | 17                                                               | 18          |
| Treated for diabetes, %                         | 3                                                                        | 2             | 3                                                                               | 3             | 3                                                                       | 3             | 3                                                                | 2           |
| Treated for depression, %                       | 7                                                                        | 7             | 7                                                                               | 7             | 7                                                                       | 6             | 7                                                                | 5           |
| <b>Follow up for dementia:</b>                  |                                                                          |               |                                                                                 |               |                                                                         |               |                                                                  |             |
| Person-years, 1000s                             | 11,477                                                                   | 1,608         | 11,361                                                                          | 1,724         | 10,579                                                                  | 2,506         | 254                                                              | 8,100       |
| Women diagnosed with dementia, n                | 22,826                                                                   | 2,810         | 22,142                                                                          | 3,494         | 20,224                                                                  | 5,412         | 368                                                              | 9,362       |
| Mean (SD) age at dementia diagnosis, years      | 78.7 (5)                                                                 | 79.2 (5)      | 78.6 (5)                                                                        | 79.5 (5)      | 78.6 (5)                                                                | 79.4 (5)      | 79.1 (5)                                                         | 80.1 (5)    |

‡ For analyses of reading, information on self-rated health, marital status or paid work was not reported in 2001 by 18% of the women, and so the missing information was supplemented by information reported in median year 2006



**eTable 4. Dementia detection risk ratios during the second decade of follow-up after various activities were recorded, comparing non-participation vs participation in them: effect of adjustment by various factors**

|                                             | <b>Adult<br/>Education</b> | <b>Art/craft/music<br/>groups</b> | <b>Voluntary<br/>work</b> | <b>Reading</b>          |
|---------------------------------------------|----------------------------|-----------------------------------|---------------------------|-------------------------|
|                                             | <b>RR (99% CI)</b>         | <b>RR (99% CI)</b>                | <b>RR (99% CI)</b>        | <b>RR (99% CI)</b>      |
| <b>Adjusted by age and region only</b>      | <b>1.20 (1.14-1.27)</b>    | <b>1.16 (1.11-1.22)</b>           | <b>1.09 (1.05-1.13)</b>   | <b>1.38 (1.20-1.58)</b> |
| <b>Additionally adjusted separately by:</b> |                            |                                   |                           |                         |
| Education                                   | 1.09 (1.03-1.15)           | 1.08 (1.03-1.14)                  | 1.01 (0.97-1.05)          | 1.29 (1.12-1.48)        |
| Area deprivation                            | 1.17 (1.11-1.24)           | 1.13 (1.08-1.18)                  | 1.06 (1.02-1.10)          | 1.33 (1.16-1.52)        |
| Strenuous exercise                          | 1.15 (1.10-1.22)           | 1.13 (1.07-1.18)                  | 1.05 (1.01-1.10)          | 1.33 (1.16-1.53)        |
| Body mass index                             | 1.19 (1.13-1.25)           | 1.16 (1.10-1.21)                  | 1.08 (1.04-1.12)          | 1.35 (1.18-1.55)        |
| Smoking                                     | 1.17 (1.11-1.23)           | 1.12 (1.07-1.17)                  | 1.05 (1.01-1.10)          | 1.32 (1.15-1.52)        |
| Alcohol consumption                         | 1.16 (1.10-1.22)           | 1.14 (1.08-1.19)                  | 1.06 (1.02-1.11)          | 1.32 (1.15-1.52)        |
| Menopausal hormone use                      | 1.20 (1.14-1.27)           | 1.16 (1.11-1.22)                  | 1.09 (1.04-1.13)          | 1.38 (1.20-1.58)        |
| Self-rated health                           | 1.13 (1.07-1.19)           | 1.12 (1.06-1.17)                  | 1.02 (0.98-1.07)          | 1.23 (1.07-1.41)        |
| Marital status                              | 1.22 (1.15-1.28)           | 1.17 (1.11-1.22)                  | 1.10 (1.05-1.14)          | 1.36 (1.19-1.56)        |
| Paid work                                   | 1.21 (1.14-1.27)           | 1.17 (1.12-1.23)                  | 1.10 (1.06-1.15)          | 1.36 (1.19-1.56)        |
| High blood pressure                         | 1.19 (1.13-1.25)           | 1.15 (1.10-1.21)                  | 1.08 (1.04-1.12)          | 1.38 (1.20-1.58)        |
| Diabetes                                    | 1.19 (1.13-1.25)           | 1.15 (1.10-1.21)                  | 1.08 (1.04-1.12)          | 1.36 (1.19-1.56)        |
| Depression                                  | 1.20 (1.14-1.26)           | 1.16 (1.11-1.22)                  | 1.08 (1.05-1.13)          | 1.36 (1.19-1.56)        |
| <b>Fully adjusted for all the above</b>     | <b>1.04 (0.98-1.09)</b>    | <b>1.04 (0.99-1.09)</b>           | <b>0.96 (0.92-1.00)</b>   | <b>1.13 (0.98-1.30)</b> |

**eTable 5. Dementia detection risk ratios during the second decade of follow-up after various activities were recorded, comparing non-participation vs participation in them: effect of age at recording**

|                                | Decade of age at recording participation in the activity |                    |                    |
|--------------------------------|----------------------------------------------------------|--------------------|--------------------|
|                                | During women's 50s                                       | During women's 60s | During women's 70s |
| <b>Adult education</b>         | 0.97 (0.85-1.10)                                         | 1.07 (1.00-1.14)   | 1.00 (0.85-1.18)   |
| <b>Art/craft/music groups</b>  | 1.00 (0.88-1.13)                                         | 1.04 (0.98-1.10)   | 1.08 (0.94-1.25)   |
| <b>Voluntary work</b>          | 0.92 (0.83-1.02)                                         | 0.97 (0.92-1.02)   | 1.01 (0.89-1.15)   |
| <b>Any of above activities</b> | 0.96 (0.88-1.05)                                         | 1.00 (0.96-1.04)   | 1.01 (0.90-1.13)   |
| <b>Reading</b>                 | 1.14 (0.69-1.89)                                         | 1.04 (0.86-1.26)   | 1.26 (1.01-1.59)   |

**eFigure 2. Million Women Study results for PHYSICAL inactivity: Dementia detection rate ratios, inactive vs active, during various time periods after recording PHYSICAL activity (*Neurology* 2020; 94: e123–32)**

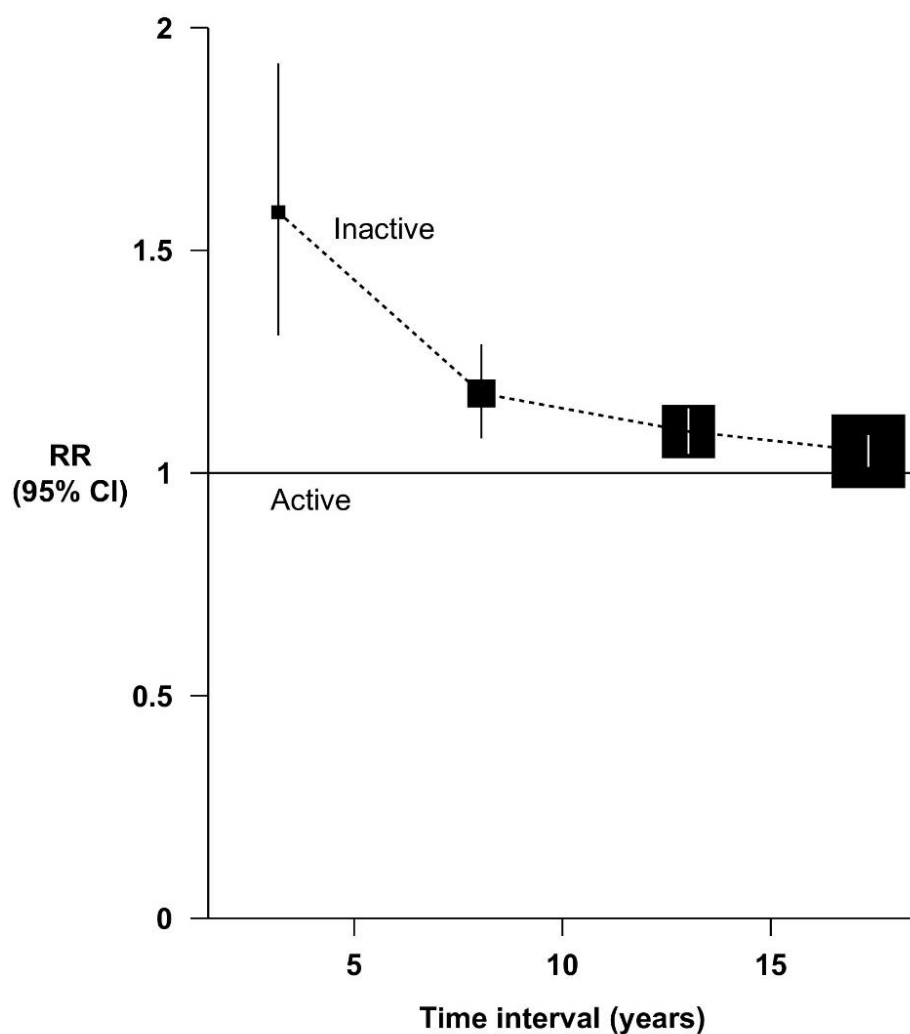

|                                       |                   |                   |                     |                   |
|---------------------------------------|-------------------|-------------------|---------------------|-------------------|
| <b>Inactive/active cases</b>          | 196/282           | 824/1586          | 3054/6320           | 5843/12852        |
| <b>Time interval (mean for cases)</b> | <5 years (3.2)    | 5-<10 years (8.1) | 10-<15 years (13.0) | 15+ years (17.3)  |
| <b>RR (95% CI)</b>                    | 1.59 (1.31, 1.92) | 1.18 (1.08, 1.29) | 1.09 (1.05, 1.14)   | 1.05 (1.02, 1.08) |

Stratified by year of birth and year reporting exposure; and adjusted for region of residence, educational qualifications, area deprivation, height, smoking, alcohol consumption, use of menopausal hormones and BMI.

## **Acknowledgements**

### **Membership of the Million Women Study Advisory Committee**

Emily Banks, Valerie Beral, Lucy Carpenter, Carol Dezateux (chair), Sarah Floud, Jane Green, Julietta Patnick, Richard Peto, Gillian Reeves, Cathie Sudlow.

### **Million Women Study coordinating centre staff**

Simon Abbott, Rupert Alison, Krys Baker, Angela Balkwill, Isobel Barnes, Valerie Beral, Judith Black, Roger Blanks, Anna Brown, Andrew Chadwick, Dave Ewart, Sarah Floud, Kezia Gaitskell, Toral Gathani, Laura Gerrard, Adrian Goodill, Jane Green, Jane Henderson, Carol Hermon, Darren Hogg, Isobel Lingard, Sau Wan Kan, Nicky Langston, Kirstin Pirie, Gillian Reeves, Keith Shaw, Emma Sherman, Helena Strange, Siân Sweetland, Ruth Travis, Lyndsey Trickett, Clare Wotton, Owen Yang, Heather Young.

### **NHS Breast Cancer Screening Programme collaborating centres**

The following NHS Breast Screening Centres took part in the recruitment and breast screening follow-up for the Million Women Study:

Avon, Aylesbury, Barnsley, Basingstoke, Bedfordshire & Hertfordshire, Cambridge and Huntingdon, Chelmsford and Colchester, Chester, Cornwall, Crewe, Cumbria, Doncaster, Dorset, East Berkshire, East Cheshire, East Devon, East of Scotland, East Suffolk, East Sussex, Gateshead, Gloucestershire, Great Yarmouth, Hereford and Worcester, Kent, Kings Lynn, Leicestershire, Liverpool, Manchester, Milton Keynes, Newcastle, North Birmingham, North East Scotland, North Lancashire, North Middlesex, North Nottingham, North of Scotland, North Tees, North Yorkshire, Nottingham, Oxford, Portsmouth, Rotherham, Sheffield, Shropshire, Somerset, South Birmingham, South East Scotland, South East Staffordshire, South Derbyshire, South Essex, South Lancashire, South West Scotland, Surrey, Warrington Halton St Helens and Knowsley, Warwickshire Solihull and Coventry, West Berkshire, West Devon, West London, West Suffolk, West Sussex, Wiltshire, Winchester, Wirral, Wycombe.
